# Supplementary material for: A general and efficient approach for the construction of RNA oligonucleotides containing a 5′-phosphorothiolate linkage
Source: PubMed Central journal article supplement — Nucleic Acids Res. 2010 Dec 9;39(5):e31. doi: 10.1093/nar/gkq1265 (PMC3061073; doi:10.1093/nar/gkq1265), 2010-12-09

## **A General and Efficient Approach for the Construction of RNA Oligonucleotides Containing a 5'-Phosphorothiolate Linkage**

Nan-Sheng Li<sup>1,\*</sup>, John K. Frederiksen<sup>1,†</sup>, Selene C. Koo<sup>1</sup>, Jun Lu<sup>1</sup>, Timothy J. Wilson<sup>2</sup>,  
David M.J. Lilley<sup>2,\*</sup>, and Joseph A. Piccirilli<sup>1,\*</sup>

<sup>1</sup>The University of Chicago, Center for Integrative Science, Departments of Biochemistry & Molecular Biology and Chemistry, 929 E. 57th Street, Room W406, Chicago, IL 60637, USA.

<sup>2</sup>Cancer Research UK Nucleic Acid Structure Research Group, MSI/WTB Complex, The University of Dundee, Dow Street, Dundee DD1 5EH, U.K.

<sup>†</sup>Present address: Department of Pathology and Laboratory Medicine, The University of Rochester Medical Center, 601 Elmwood Avenue, Box 626, Rochester, NY 14642.

\*To whom correspondence should be addressed. E-mails: nli@uchicago.edu, d.m.j.lilley@dundee.ac.uk, jpicciri@uchicago.edu

### **Supplementary Data**

**Table S1: Synthesis and applications of oligonucleotides containing a 3'-S linkage**

| Oligonucleotide                               | Synthetic route                                                                                                                                                                                                                                                               | Applications                                                                                                                                         | Reference |
|-----------------------------------------------|-------------------------------------------------------------------------------------------------------------------------------------------------------------------------------------------------------------------------------------------------------------------------------|------------------------------------------------------------------------------------------------------------------------------------------------------|-----------|
| 3'-S                                          |                                                                                                                                                                                                                                                                               |                                                                                                                                                      |           |
| d(T <sub>3'-S</sub> T)                        | Coupling of 5'-deoxy-5'- <i>O</i> -monomethoxytrityl-3'-mercaptothymidine with 3'- <i>O</i> -acetylthymidine in the presence of (tetrazol-1-yl) <sub>2</sub> POCH <sub>2</sub> CH <sub>2</sub> CN and 2,6-lutidine                                                            |                                                                                                                                                      | (1)       |
|                                               | Solid phase synthesis using thymidine 3'- <i>S</i> -phosphoramidite                                                                                                                                                                                                           |                                                                                                                                                      | (2)       |
| d(GCACGT <sub>3'-S</sub> TGCACG)              | Solid phase synthesis using thymidine 3'- <i>S</i> -phosphoramidite                                                                                                                                                                                                           | Thio analog of a thymine photodimer                                                                                                                  | (3)       |
| d(CCCUCU <sub>3'-S</sub> A)                   | Solid phase synthesis using ribo- and deoxyribouridine 3'- <i>S</i> -phosphoramidites                                                                                                                                                                                         | Metal ion-dependent cleavage by the <i>Tetrahymena</i> group I ribozyme                                                                              | (4)       |
|                                               |                                                                                                                                                                                                                                                                               | Metal ion-dependent cleavage by Klenow fragment of <i>E. coli</i> DNA polymerase I                                                                   | (5)       |
| U <sub>3'-S</sub> U                           | Addition of 2',3'- <i>O</i> -bis(benzoyl)-uridine 5'- <i>H</i> -phosphonate to 2',5'- <i>O</i> -bis(Fpmp)-3'-( <i>o,p</i> -dinitrophenylsulfanyl) uridine                                                                                                                     | RNA cleavage studies                                                                                                                                 | (6)       |
| I <sub>3'-S</sub> U                           | Addition of 2',3'- <i>O</i> -bis( <i>tert</i> -butyldimethylsilyl)-uridine 5'- <i>H</i> -phosphonate to 9-[5- <i>O</i> -(monomethoxytrityl)-3-deoxy-3- <i>S</i> -(5-nitropyridyl-2-disulfanyl)-2- <i>O</i> -( <i>tert</i> -butyldimethylsilyl)-β-D-ribofuranosyl]hypoxanthine | Metal ion-dependent cleavage by the <i>Tetrahymena</i> group I ribozyme; test substrate for T4 PNK, snake venom PDE, and ribonuclease T <sub>2</sub> | (7,8)     |
|                                               |                                                                                                                                                                                                                                                                               | Sugar pucker conformational analysis by NMR                                                                                                          | (9)       |
| d(GATT <sub>3'-S</sub> GCTAGGC)               | Solid phase synthesis using thymidine 3'- <i>S</i> -phosphoramidite                                                                                                                                                                                                           | Mechanistic studies of the <i>E. coli</i> RuvC protein                                                                                               | (10)      |
| (dU <sub>3'-S</sub> ) GUGAGUACUC<br>CCUCUAAAA | Solid phase synthesis using riboinosine and deoxyribouridine 3'- <i>S</i> -                                                                                                                                                                                                   | Metal ion dependence of pre-mRNA splicing                                                                                                            | (11)      |

|                                                                                                              |                                                                              |                                                                         |         |
|--------------------------------------------------------------------------------------------------------------|------------------------------------------------------------------------------|-------------------------------------------------------------------------|---------|
| AI <sub>3'-S</sub> CUCGCGGUU                                                                                 | phosphoramidites                                                             |                                                                         |         |
| (C <sub>2'-OMe</sub> ) <sub>3</sub> UCdU <sub>3'-S</sub> rA                                                  | Solid phase synthesis using 2'-deoxy-3'-thiouridine phosphoramidites         | Metal ion-dependent cleavage by the <i>Tetrahymena</i> group I ribozyme | (12,13) |
| R <sub>P</sub> ,S <sub>P</sub> -(C <sub>2'-OMe</sub> ) <sub>3</sub> UCdU <sub>3'-S</sub> rA <sub>5'-PS</sub> |                                                                              |                                                                         | (13)    |
| UC <sub>3'-S</sub> GAGCGGUCU                                                                                 | Solid phase synthesis using 3'-thiouridine and thiocytidine phosphoramidites | Metal ion-dependent cleavage by the ai5γ group II intron                | (14)    |
| U <sub>3'-S</sub> ACUAUGUAU                                                                                  |                                                                              |                                                                         |         |
| UC <sub>3'-S</sub> ACUAUGUAU                                                                                 |                                                                              |                                                                         | (15)    |
| CGGGAU <sub>3'-S</sub> ACUAUG                                                                                |                                                                              |                                                                         |         |
| GACAI <sub>3'-S</sub> GAUCCAAGAGUACU                                                                         | Solid phase synthesis using 3'-thioinosine phosphoramidite                   | Metal ion dependence of pre-mRNA splicing                               | (16)    |
| d(CCTAAATT <sub>3'-S</sub> TGCC) and others                                                                  | Solid phase synthesis using thymidine 3'-S-phosphoramidite                   | Sugar pucker conformational analysis by NMR                             | (17,18) |
| d(AAACGTCGCACTTCGC <sub>3'-S</sub> TAGGCAGCCTGCATCCAGG)                                                      | Solid phase synthesis using 2'-deoxy-3'-thiocytidine phosphoramidite         | Mechanistic studies of <i>E. coli</i> DNA T:G-mismatch endonuclease     | (19)    |
| d(TGTGTATTGTCT <sub>3'-S</sub> ATAG)                                                                         | Solid phase synthesis using thymidine 3'-S-phosphoramidite                   | Mechanistic studies of TrwC conjugative relaxase                        | (20)    |
| d(TGTGTATTGTCT <sub>3'-S</sub> ATAGCCAGATTTAAGGA)                                                            |                                                                              |                                                                         |         |
| d(GCGCACCGAAAGGTGCGTATTGTCT <sub>3'-S</sub> ATAG)                                                            |                                                                              |                                                                         |         |

Abbreviations: d, deoxyribo-; r, ribo-; Fpmp, 1-(2-fluorophenyl)-4-methoxypiperidin-4-yl; I, inosine; PNK, polynucleotide kinase; PDE, phosphodiesterase; PS, nonbridging phosphorothioate.

**Table S2: Synthesis and applications of oligonucleotides containing a 5'-S linkage**

| Oligonucleotide                                               | Synthetic route                                                                                                                                                | Applications                                                                                                     | Reference |
|---------------------------------------------------------------|----------------------------------------------------------------------------------------------------------------------------------------------------------------|------------------------------------------------------------------------------------------------------------------|-----------|
| <b>5'-S</b>                                                   |                                                                                                                                                                |                                                                                                                  |           |
| $U_{5'-SH}(U_{5'-S})_n U_{5'-S,2',3'-P}$                      | Treatment of 5'-thiouridine-2',3'-cyclic phosphate with diphenyl phosphorochloridate and base                                                                  |                                                                                                                  | (21)      |
| d(TT <sub>5'-S</sub> )                                        | Thymidine 3'-thiophosphate attack on 5'-iodo-5'-deoxythymidine                                                                                                 |                                                                                                                  | (22)      |
| d(TT <sub>5'-S</sub> T <sub>5'-S,3'-O-PS</sub> )              | Repeated addition of 5'- <i>O</i> -tosylthymidine-3'- <i>O</i> -cyanoethylphosphorothioate mononucleotides to a terminal thymidine 3'- <i>O</i> -thiophosphate |                                                                                                                  | (23)      |
| d[T(T <sub>5'-S</sub> ) <sub>12</sub> ]                       |                                                                                                                                                                | Test substrates for T4 PNK and DNA polymerase, <i>E. coli</i> DNA polymerase I, snake venom PDE, and S1 nuclease | (24)      |
| d(TCCGTTGAAGCCTGCTTTT <sub>5'-S</sub> TTATACTAAGCTTGAGC)      | Solid phase synthesis using 5'- <i>S</i> -trityl deoxythymidine phosphoramidite                                                                                | Suicide substrate for DNA topoisomerase I                                                                        | (25)      |
| UU <sub>5'-S</sub>                                            | Uridine 3'- <i>H</i> -phosphonate attack on 5'-deoxy-5'-( <i>o</i> -nitrophenyldisulfanyl)uridine                                                              | RNA cleavage studies                                                                                             | (26)      |
|                                                               | Uridine 3'- <i>O</i> -thiophosphate attack on 5'-iodo-5'-deoxyuridine                                                                                          | RNA cleavage studies                                                                                             | (27)      |
| d(ACGGTCTCA <sub>5'-S</sub> CGAGC)                            | Solid phase synthesis using 5'- <i>S</i> -trityl-2'-deoxyadenosine and 2'- <i>O</i> -Cee-cytidine phosphoramidites                                             | RNA cleavage studies; metal ion-dependent cleavage by the hammerhead ribozyme                                    | (28,29)   |
| d(ACGGTCT)r(C)d(A <sub>5'-S</sub> CGAGC)                      |                                                                                                                                                                |                                                                                                                  |           |
| GCCGUCC <sub>5'-S</sub> CCCG                                  | Solid phase synthesis using "5'-thiol amidite"                                                                                                                 | Metal ion-dependent cleavage by the hammerhead ribozyme                                                          | (30)      |
| d(AGCCCTTACTT <sub>5'-S</sub> TGACGGTATATCT) (and others)     | Solid phase synthesis using 5'- <i>S</i> -(4,4'-dimethoxytrityl)-2'-deoxy-5'-thiothymidine phosphoramidite                                                     | Detection and construction of DNA arrays based on incorporation of selective cleavage sites                      | (31)      |
| UUC <sub>2'-O-<i>o</i>-NBn</sub> d(G <sub>5'-S</sub> )GGUCGGC | Solid phase synthesis using 5'- <i>S</i> -trityl-2'-deoxyguanosine phosphoramidite                                                                             | General acid catalysis by the HDV ribozyme                                                                       | (32)      |
| d(GGGCAT)r(C)d(C <sub>5'-S</sub> TGGATTCCACTCGCC)             | Enzymatic ligation of 5'-thiophosphorylated d(CTGGATTCCACTCGCC) with d(GGGCAT)r(C)                                                                             | General acid catalysis by the hammerhead ribozyme                                                                | (33)      |

Abbreviations: d, deoxyribo-; r, ribo-; PS, nonbridging phosphorothioate; PNK, polynucleotide kinase; PDE, phosphodiesterase; Cee, 1-(2-chloroethoxy)ethyl; *o*-NBn, *ortho*-nitrobenzyl; HDV, hepatitis delta virus.

## References

1. Cosstick, R. and Vyle, J.S. (1988) Synthesis and Phosphorus Sulfur Bond-Cleavage of 3'-Thiothymidylyl(3'-5')Thymidine. *J. Chem. Soc. Chem. Comm.*, 992-993.
2. Cosstick, R. and Vyle, J.S. (1990) Synthesis and Properties of Dithymidine Phosphate Analogs Containing 3'-Thiothymidine. *Nucleic Acids Res.*, **18**, 829-835.
3. Murata, T., Iwai, S. and Ohtsuka, E. (1992) Synthesis of a Dodecadeoxyribooligonucleotide Containing a 3'-Thio Analog of Thymidine Photodimer. *Heterocycles*, **33**, 529-531.
4. Piccirilli, J.A., Vyle, J.S., Caruthers, M.H. and Cech, T.R. (1993) Metal ion catalysis in the Tetrahymena ribozyme reaction. *Nature*, **361**, 85-88.
5. Curley, J.F., Joyce, C.M. and Piccirilli, J.A. (1997) Functional evidence that the 3'-5' exonuclease domain of *Escherichia coli* DNA polymerase I employs a divalent metal ion in leaving group stabilization. *J. Am. Chem. Soc.*, **119**, 12691-12692.
6. Liu, X.H. and Reese, C.B. (1996) 3'-Thiouridylyl-(3'•5')-uridine. *Tetrahedron Lett.*, **37**, 925-928.
7. Weinstein, L.B., Jones, B.C.N.M., Cosstick, R. and Cech, T.R. (1997) A second catalytic metal ion in a group I ribozyme. *Nature*, **388**, 805-808.
8. Weinstein, L.B., Earnshaw, D.J., Cosstick, R. and Cech, T.R. (1996) Synthesis and characterization of an RNA dinucleotide containing a 3'-S-phosphorothiolate linkage. *J. Am. Chem. Soc.*, **118**, 10341-10350.
9. Beevers, A.P.G., Witch, E.M., Jones, B.C.N.M., Cosstick, R., Arnold, J.R.P. and Fisher, J. (1999) Conformational analysis of 3'-S-PO<sub>3</sub>-linked ribo- and deoxyribodinucleoside monophosphates. *Magn. Reson. Chem.*, **37**, 814-820.
10. Shah, R., Cosstick, R. and West, S.C. (1997) The RuvC protein dimer resolves Holliday junctions by a dual incision mechanism that involves base-specific contacts. *Embo J.*, **16**, 1464-1472.
11. Sontheimer, E.J., Sun, S. and Piccirilli, J.A. (1997) Metal ion catalysis during splicing of premessenger RNA. *Nature*, **388**, 801-805.
12. Shan, S., Yoshida, A., Sun, S., Piccirilli, J.A. and Herschlag, D. (1999) Three metal ions at the active site of the Tetrahymena group I ribozyme. *Proc. Natl. Acad. Sci. USA*, **96**, 12299-12304.
13. Yoshida, A., Sun, S. and Piccirilli, J.A. (1999) A new metal ion interaction in the Tetrahymena ribozyme reaction revealed by double sulfur substitution. *Nat. Struct. Biol.*, **6**, 318-321.
14. Sontheimer, E.J., Gordon, P.M. and Piccirilli, J.A. (1999) Metal ion catalysis during group II intron self-splicing: parallels with the spliceosome. *Genes Dev.*, **13**, 1729-1741.

15. Gordon, P.M., Sontheimer, E.J. and Piccirilli, J.A. (2000) Kinetic characterization of the second step of group II intron splicing: role of metal ions and the cleavage site 2'-OH in catalysis. *Biochemistry*, **39**, 12939-12952.
16. Gordon, P.M., Sontheimer, E.J. and Piccirilli, J.A. (2000) Metal ion catalysis during the exon-ligation step of nuclear pre-mRNA splicing: extending the parallels between the spliceosome and group II introns. *RNA*, **6**, 199-205.
17. Beevers, A.P., Fettes, K.J., Sabbagh, G., Murad, F.K., Arnold, J.R., Cosstick, R. and Fisher, J. (2004) NMR and UV studies of 3'-S-phosphorothiolate modified DNA in a DNA : RNA hybrid dodecamer duplex; implications for antisense drug design. *Org. Biomol. Chem.*, **2**, 114-119.
18. Beevers, A.P., Fettes, K.J., O'Neil, I.A., Roberts, S.M., Arnold, J.R., Cosstick, R. and Fisher, J. (2002) Probing the effect of a 3'-S-phosphorothiolate link on the conformation of a DNA:RNA hybrid; implications for antisense drug design. *Chem. Commun. (Camb.)*, 1458-1459.
19. Elliott, S.L., Brazier, J., Cosstick, R. and Connolly, B.A. (2005) Mechanism of the Escherichia coli DNA T:G-mismatch endonuclease (Vsr protein) probed with thiophosphate-containing oligodeoxynucleotides. *J. Mol. Biol.*, **353**, 692-703.
20. Gonzalez-Perez, B., Lucas, M., Cooke, L.A., Vyle, J.S., de la Cruz, F. and Moncalian, G. (2007) Analysis of DNA processing reactions in bacterial conjugation by using suicide oligonucleotides. *Embo J.*, **26**, 3847-3857.
21. Michelson, A.M. (1962) Polynucleotides. Part IV. Synthesis of Oligonucleotide Analogues Substituted in the Sugar Portion. *J. Chem. Soc.*, 979-982.
22. Cook, A.F. (1970) Nucleoside S-alkyl phosphorothioates. IV. Synthesis of nucleoside phosphorothioate monoesters. *J. Am. Chem. Soc.*, **92**, 190-195.
23. Chladek, S. and Nagyvary, J. (1972) Nucleophilic reactions of some nucleoside phosphorothioates. *J. Am. Chem. Soc.*, **94**, 2079-2085.
24. Rybakov, V.N., Rivkin, M.I. and Kumarev, V.P. (1981) Some substrate properties of analogues of oligothymidylates with p-s-C5' bonds. *Nucleic Acids Res.*, **9**, 189-201.
25. Burgin, A.B., Jr., Huizenga, B.N. and Nash, H.A. (1995) A novel suicide substrate for DNA topoisomerases and site-specific recombinases. *Nucleic Acids Res.*, **23**, 2973-2979.
26. Liu, X.H. and Reese, C.B. (1995) Uridylyl-(3'□5')-(5'-Thiouridine) - an Exceptionally Base-Labile Di-Ribonucleoside Phosphate Analog. *Tetrahedron Lett.*, **36**, 3413-3416.
27. Thomson, J.B., Patel, B.K., Jimenez, V., Eckart, K. and Eckstein, F. (1996) Synthesis and Properties of Diuridine Phosphate Analogues Containing Thio and Amino Modifications. *J. Org. Chem.*, **61**, 6273-6281.
28. Kuimelis, R.G. and McLaughlin, L.W. (1997) Application of a 5'-bridging phosphorothioate to probe divalent metal and hammerhead ribozyme mediated RNA cleavage. *Bioorg. Med. Chem.*, **5**, 1051-1061.
29. Kuimelis, R.G. and McLaughlin, L.W. (1995) Cleavage properties of an oligonucleotide containing a bridged internucleotide 5'-phosphorothioate RNA linkage. *Nucleic Acids Res.*, **23**, 4753-4760.

30. Zhou, D.M., Usman, N., Wincott, F.E., MatulicAdamic, J., Orita, M., Zhang, L.H., Komiyama, M., Kumar, P.K.R. and Taira, K. (1996) Evidence for the rate-limiting departure of the 5'-oxygen in nonenzymatic and hammerhead ribozyme-catalyzed reactions. *J. Am. Chem. Soc.*, **118**, 5862-5866.
31. Jahn-Hofmann, K. and Engels, J.W. (2004) Efficient Solid Phase Synthesis of Cleavable Oligodeoxynucleotides Based on a Novel Strategy for the Synthesis of 5'-S-(4,4'-Dimethoxytrityl)-2'-deoxy-5'-thionucleoside Phosphoramidites. *Helv. Chim. Acta*, **87**, 2812-2828.
32. Das, S.R. and Piccirilli, J.A. (2005) General acid catalysis by the hepatitis delta virus ribozyme. *Nat. Chem. Biol.*, **1**, 45-52.
33. Thomas, J.M. and Perrin, D.M. (2009) Probing general acid catalysis in the hammerhead ribozyme. *J. Am. Chem. Soc.*, **131**, 1135-1143.

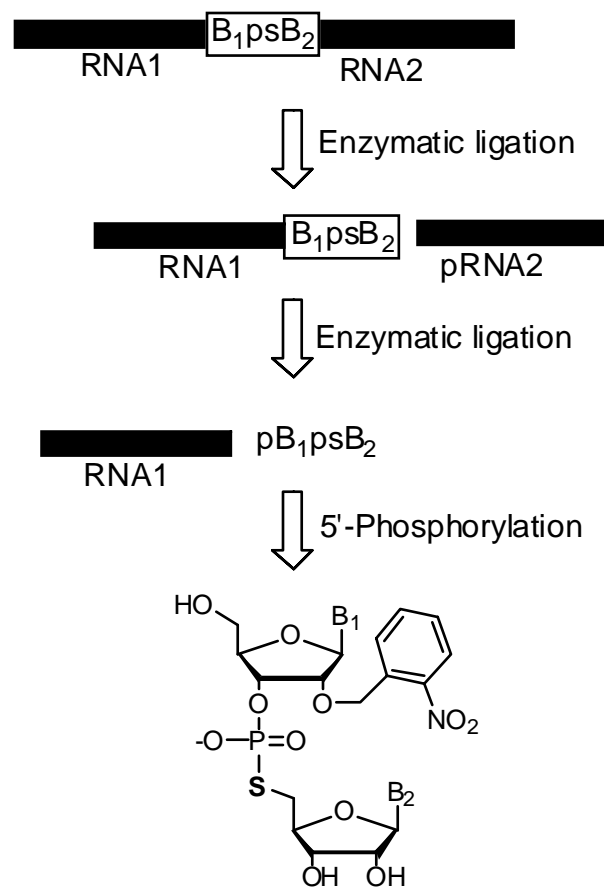

**Figure S1.** Retrosynthetic scheme for the construction of RNA oligonucleotides containing a 5'-phosphorothiolate linkage.



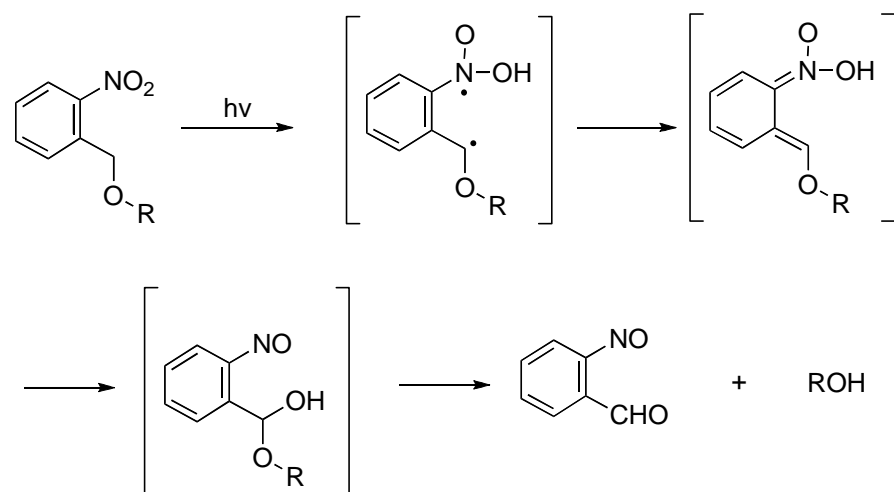

**Figure S2.** Mechanism of the UV light-mediated removal of the *o*-nitrobenzyl group to form ROH.

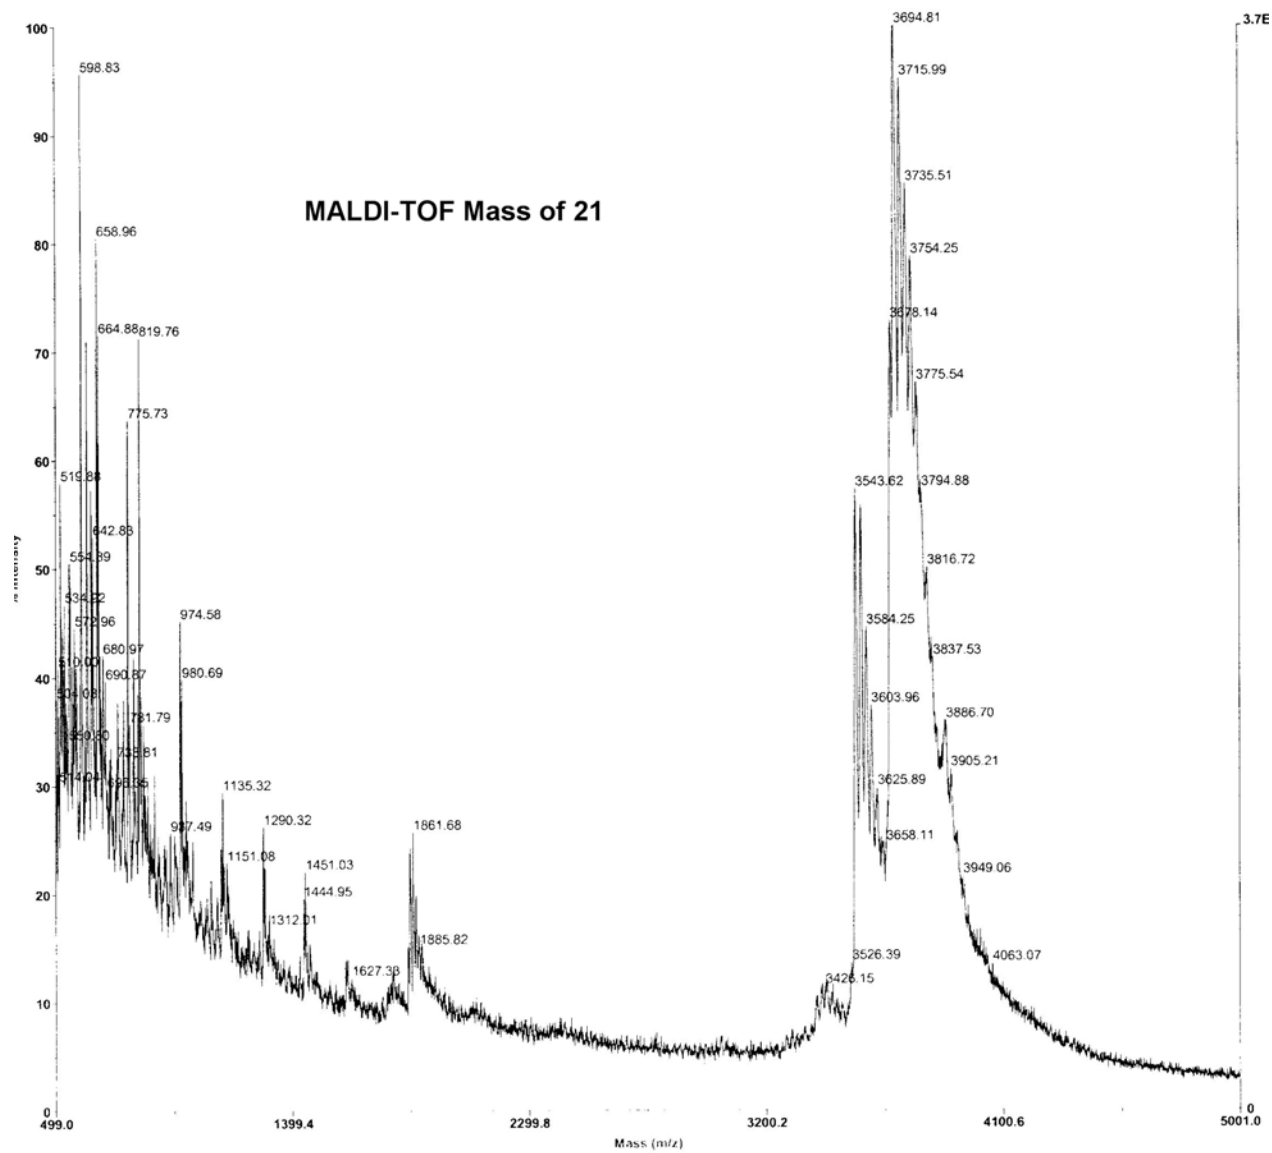

**Figure S3:** MALDI-TOF Mass of **21**: Calcd Mass: 3694.5, MALDI-TOF Mass: 3694.8.

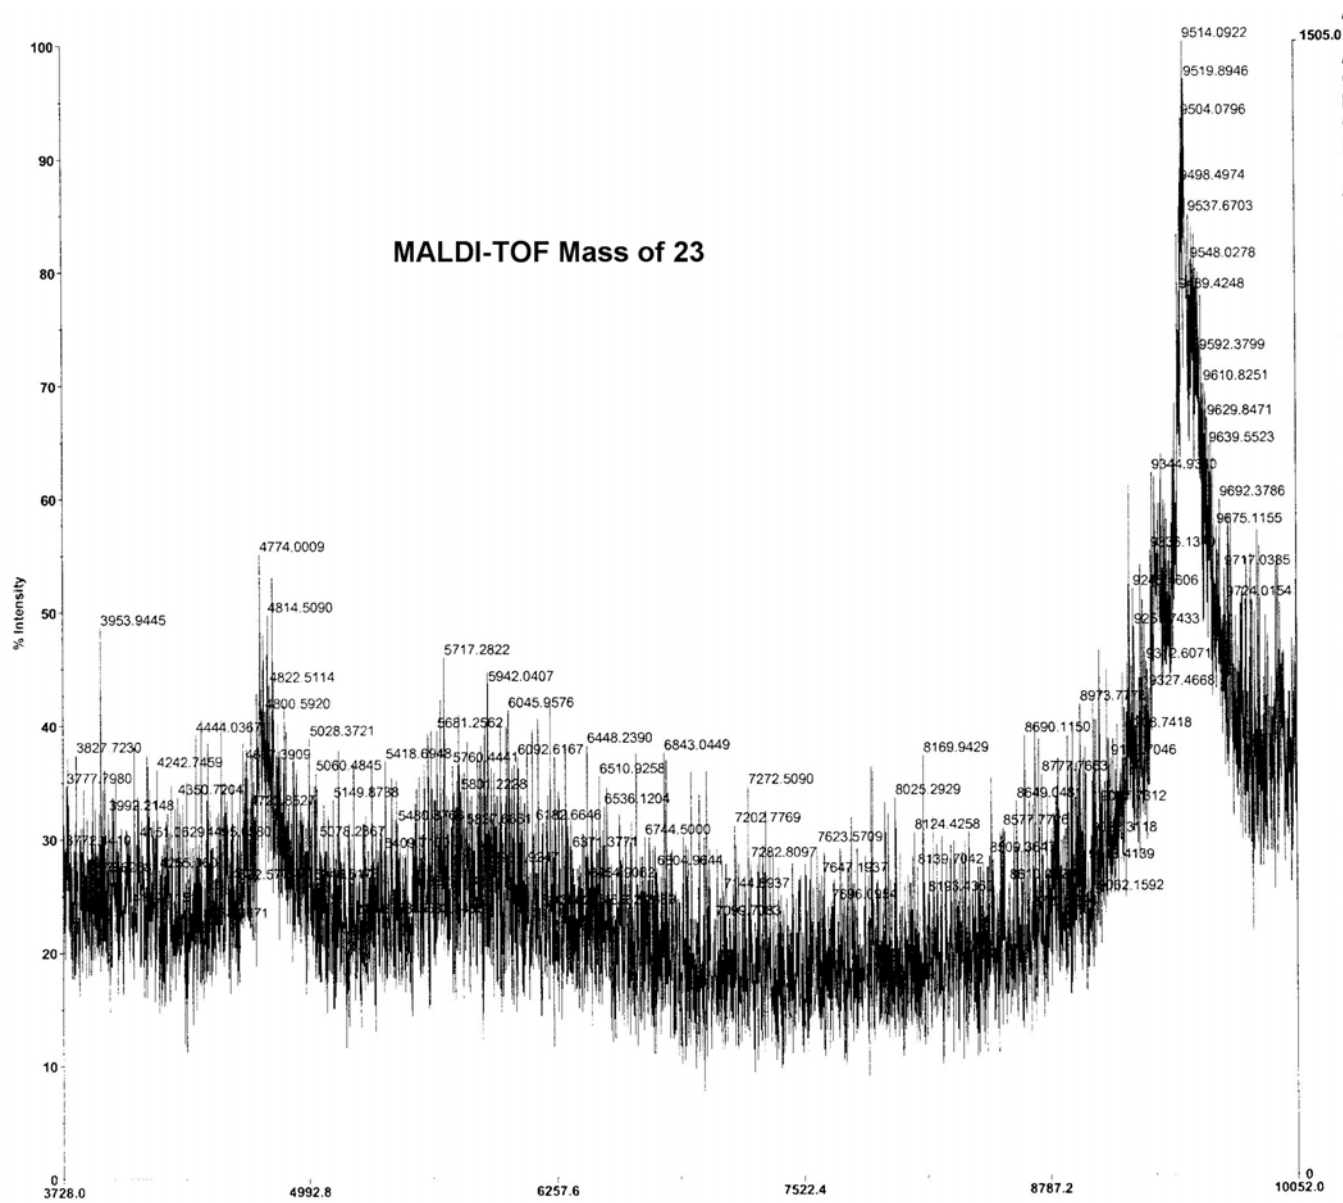

**Figure S4:** MALDI-TOF Mass of **23**: Calcd Mass: 9515.3, MALDI-TOF Mass: 9514.1.

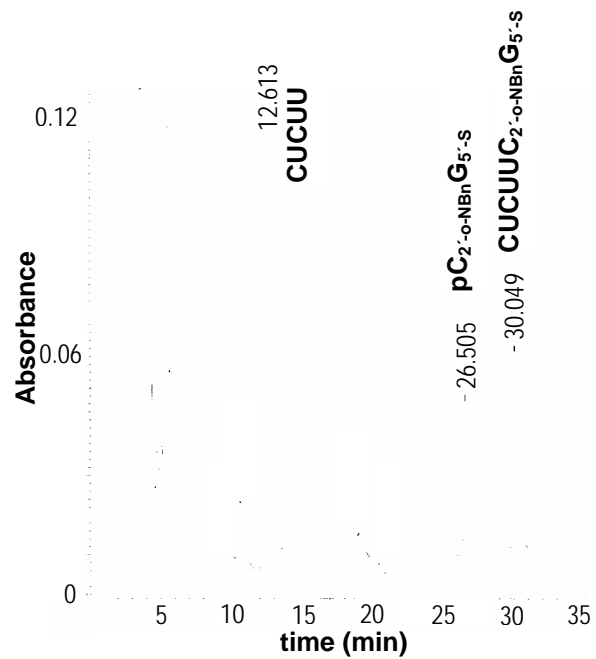

**Figure S5.** HPLC trace of crude reaction mixture after the first ligation step. HPLC conditions: C18 reversed-phase column, 6-16% acetonitrile / 94-84% 0.1 M TEAA pH 7.0 over 35 min. Peak identities are confirmed by migration of purified peaks on a denaturing gel.

**Scheme S1:** Synthesis of 5'-GCGCG<sub>2'</sub>-*o*-NBnA<sub>5'</sub>-SAGGGCGUC-3'

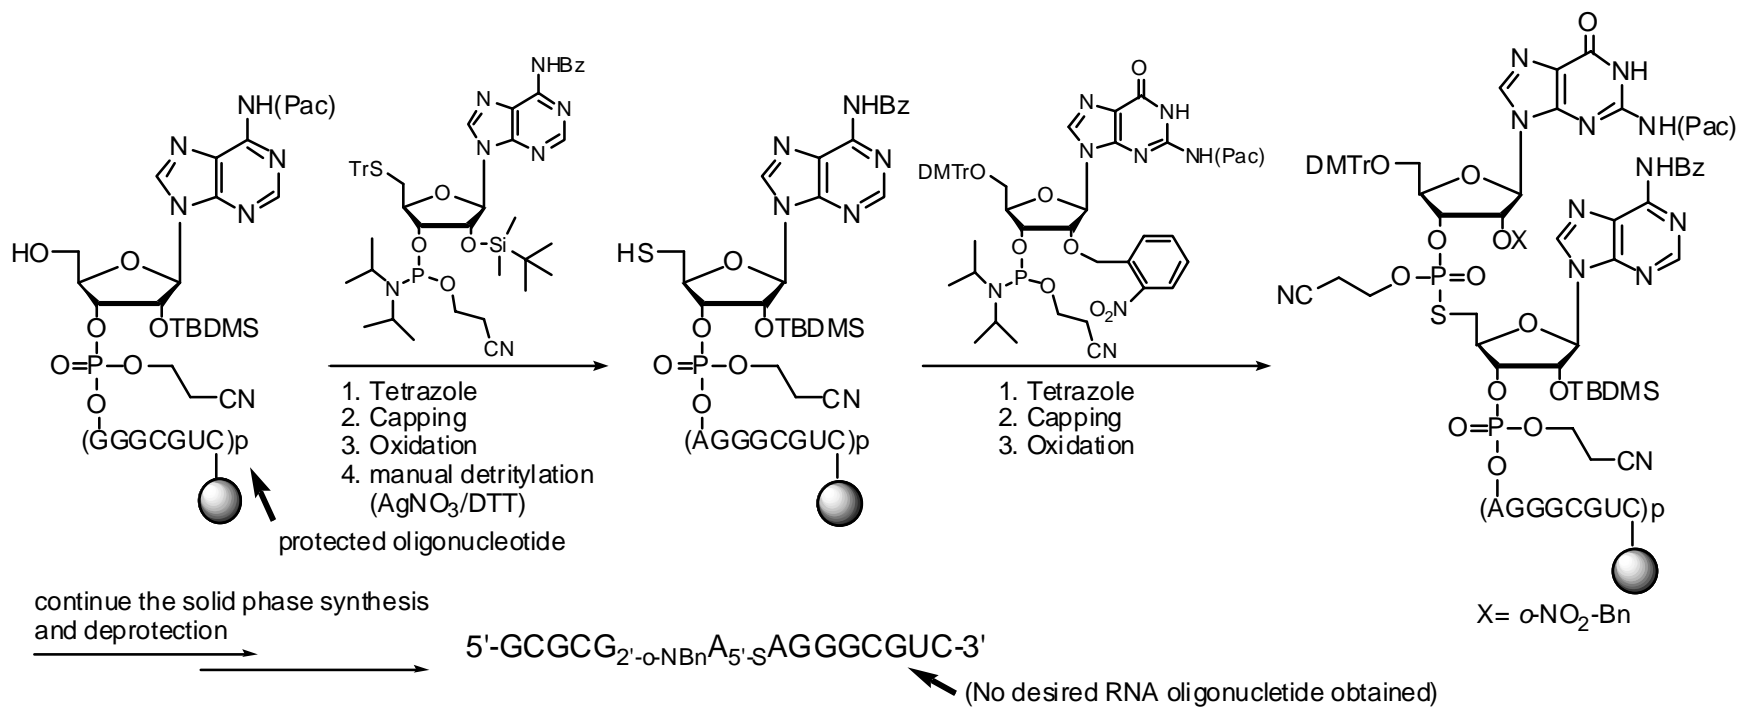

**Scheme S2:** Synthesis of 5'-GCGCG<sub>2'</sub>-*o*-NBnA<sub>5'</sub>-SAGGGCGUC-3'

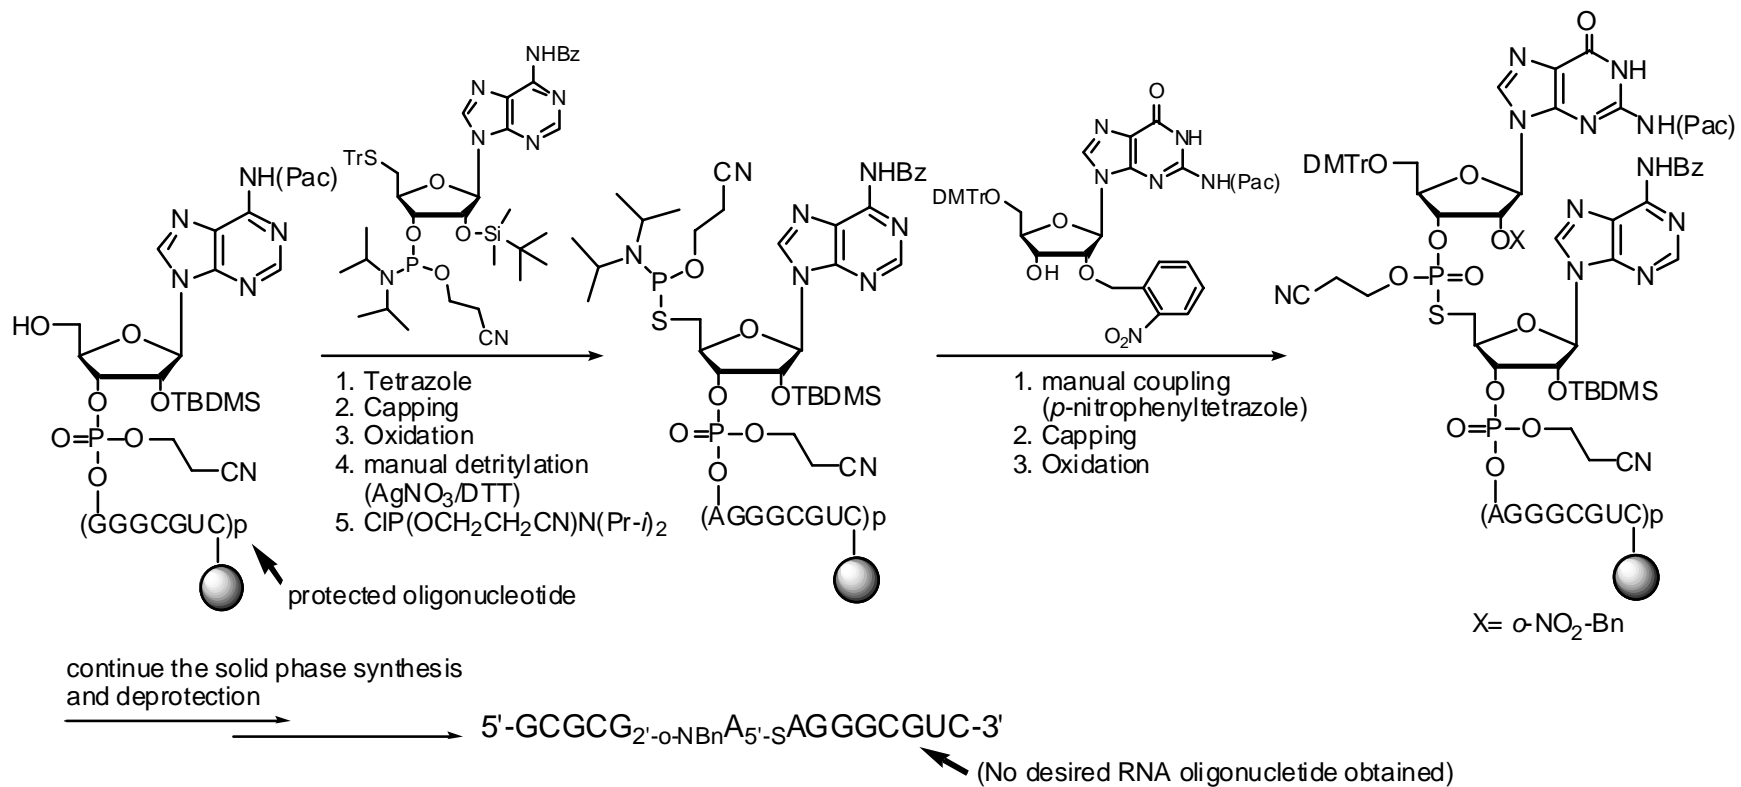

**Scheme S3:** Synthesis of 5'-GCGCG<sub>2</sub>'-*o*-NBnA<sub>5</sub>'-SAGGGCGUCGUCGCCCCGA-3'

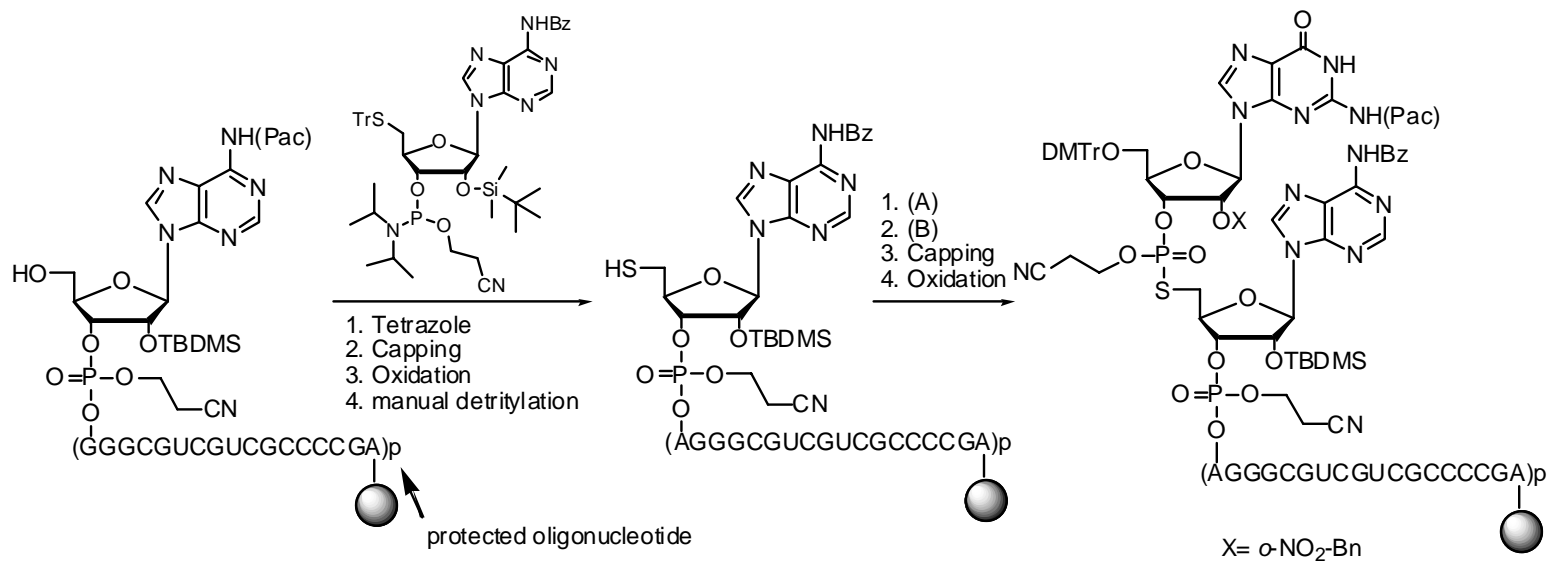

continue the solid phase synthesis  
and deprotection

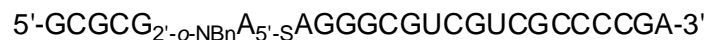

(No desired RNA oligonucleotide obtained)

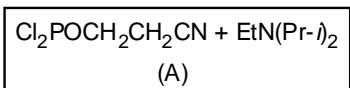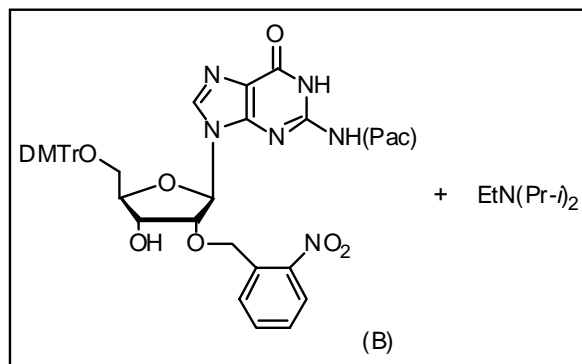

**Scheme S4:** Synthesis of 5'-GCGCG<sub>2'</sub>-*o*-NBnA<sub>5'</sub>-SAGGGCGUCGUCGCCCCGA-3'

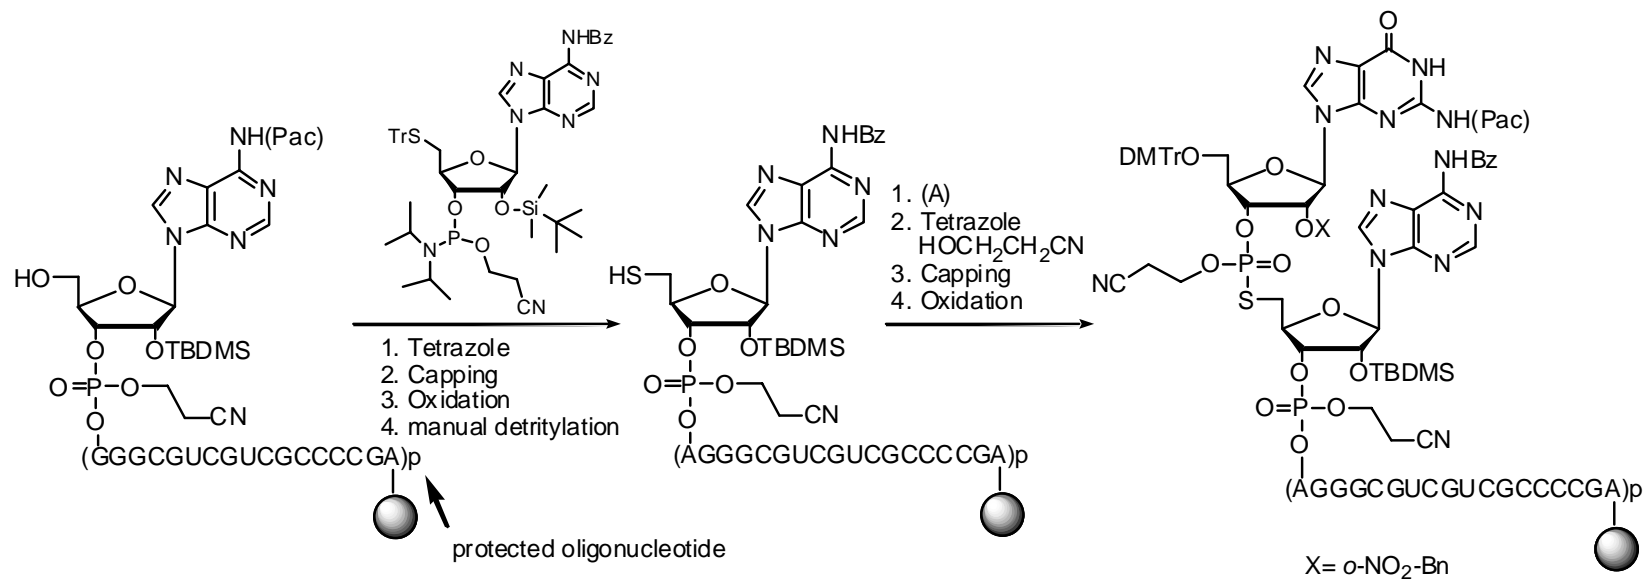

continue the solid phase synthesis  
and deprotection

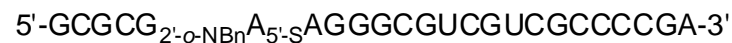

(No desired RNA oligonucleotide obtained)

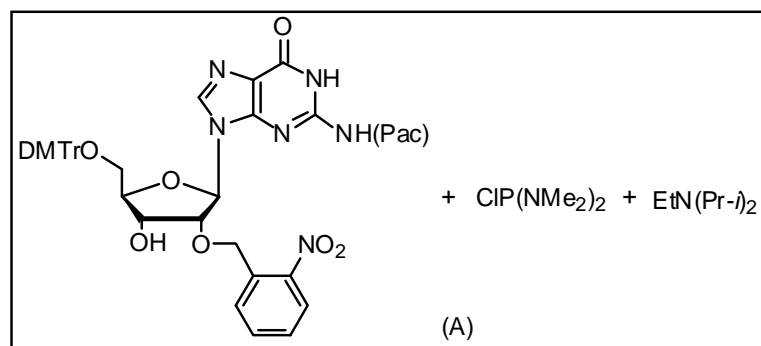

Supplement: supp_gkq1265_NAR-SD-revised2.pdf [file supp_gkq1265_NAR-SD-revised2.pdf]
